# Supplementary figures and images for: Determination of seven phenolic acids in honey by counter flow salting-out homogeneous liquid–liquid extraction coupled with ultra-high performance liquid chromatography-tandem mass spectrometry
Source: Royal Society of Chemistry journal article supplement (doi:10.1039/c9ay01492f), 2019-01-01

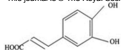

CA

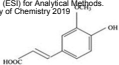

FA

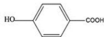

HA

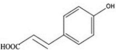

p-CA

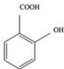

SaA

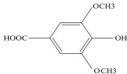

SyA

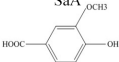

VA

Supplement: c9ay01492f1.pdf [file c9ay01492f1.pdf]
